# Supplementary material for: Obesity and Insulin Resistance Are Inversely Associated with Serum and Adipose Tissue Carotenoid Concentrations in Adults
Source: PubMed Central journal article supplement — J Nutr. 2019 Aug 28;150(1):38–46. doi: 10.1093/jn/nxz184 (PMC6946897; doi:10.1093/jn/nxz184), 2019-08-28
Supplement: nxz184_supplemental_file.pdf [file nxz184_supplemental_file.pdf]

**Supplemental Table 1:** Daily energy intake, macro- and micro- nutrients intake

|                                                 | Mean | SD   |
|-------------------------------------------------|------|------|
| Energy (Kcal)                                   | 2029 | 783  |
| Protein (g)                                     | 104  | 41   |
| Protein (%)                                     | 21   | 6    |
| Carbohydrate (g)                                | 209  | 98   |
| Carbohydrate (%)                                | 40   | 9    |
| Total fat (g)                                   | 82   | 41   |
| Fat (%)                                         | 35   | 7    |
| Saturated fat (g)                               | 32   | 17   |
| Polyunsaturated fat (g)                         | 13   | 8    |
| Monounsaturated fat (g)                         | 32   | 17   |
| Cholesterol (mg)                                | 335  | 176  |
| Starch (g)                                      | 108  | 49   |
| Sugars (g)                                      | 99   | 71   |
| Dietary fibre (g)                               | 22   | 8    |
| Alcohol (g)                                     | 1    | 4    |
| Total Vitamin A equivalents ( $\mu\text{g}$ )   | 696  | 385  |
| Retinol ( $\mu\text{g}$ )                       | 353  | 231  |
| $\beta$ -carotene-equivalents ( $\mu\text{g}$ ) | 2094 | 1792 |
| Vitamin C (mg)                                  | 88   | 69   |
| Vitamin D ( $\mu\text{g}$ )                     | 4    | 4    |
| Vitamin E (mg)                                  | 10   | 5    |
| Sodium (mg)                                     | 2617 | 1196 |
| Potassium (mg)                                  | 3069 | 934  |
| Magnesium (mg)                                  | 365  | 130  |
| Calcium (mg)                                    | 885  | 380  |

Dietary data available in cohort 2 ( $n=64$ )

Supplementary Data

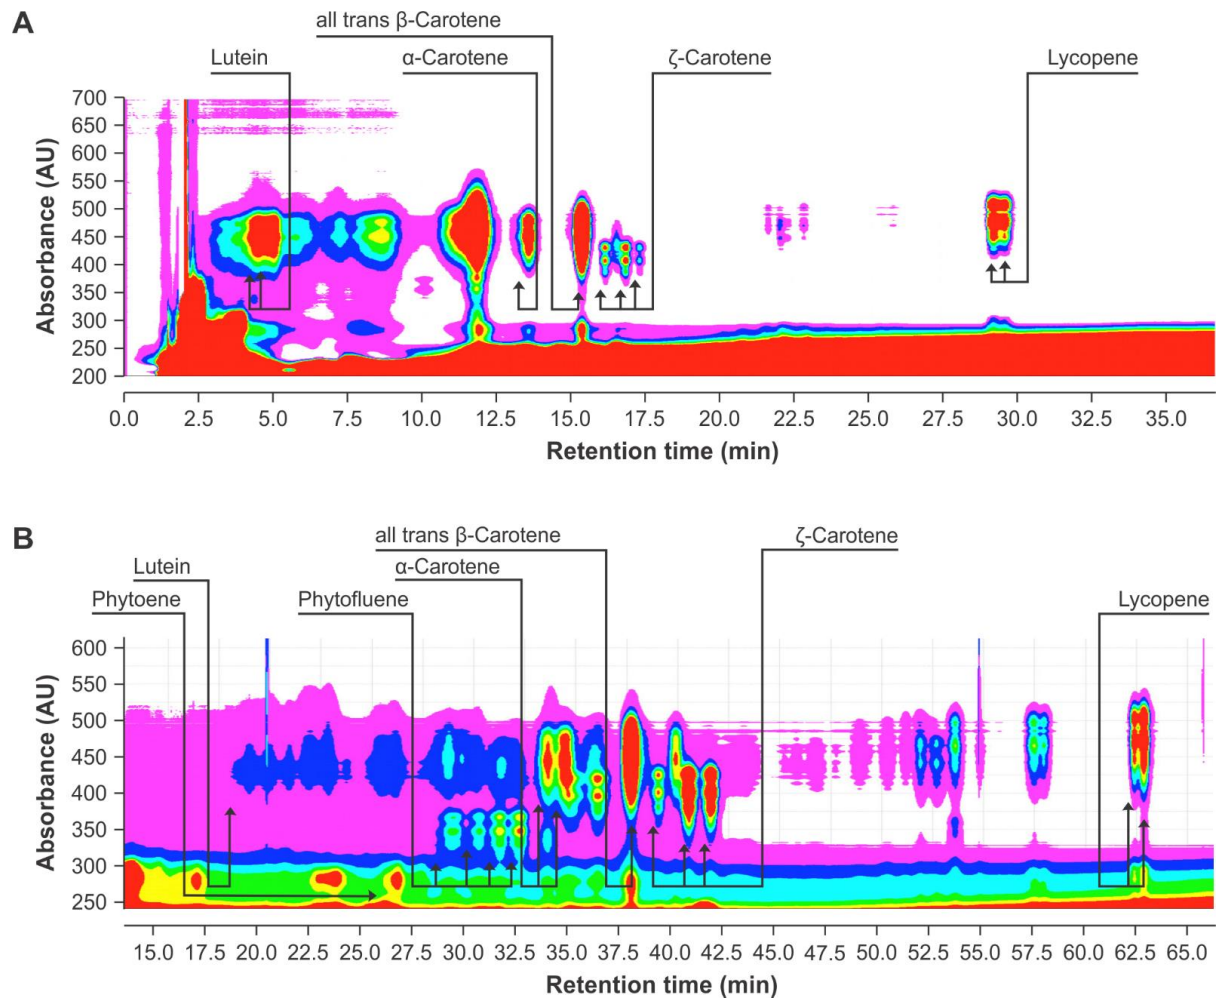

**Supplemental Figure 1:** Representative HPLC analysis spectra of serum (A) and adipose tissue (B) carotenoids (spectrum range 200-700 nm).
